# Supplementary material for: Cell interactome in sarcopenia during aging
Source: PubMed Central journal article supplement — J Cachexia Sarcopenia Muscle. 2022 Feb 17;13(2):919–31. doi: 10.1002/jcsm.12937 (PMC8977965; doi:10.1002/jcsm.12937), 2022-02-17
Supplement: JCSM-13-919-s001.pdf [file JCSM-13-919-s001.pdf]

**Table S2** Primary antibodies used in the western blot

| <b>Primary antibody</b> | <b>Supplier</b>                              | <b>Reference</b> |
|-------------------------|----------------------------------------------|------------------|
| ATF6 $\alpha$           | Santa Cruz Biotechnology, CA, USA            | sc-22799         |
| Bad                     | Cell Signaling, Danvers, MA                  | 9292             |
| Bax                     | Cell Signaling                               | 2772             |
| Bcl-2                   | Santa Cruz Biotechnology                     | sc-7382          |
| Beclin-1                | Cell Signaling                               | 4445             |
| Bik                     | Cell Signaling                               | 4592             |
| Bim                     | Cell Signaling                               | 2819             |
| CaMKII                  | Cell Signaling                               | 3362             |
| CI-20 (NDUFB8)          | Abcam, Cambridge, UK                         | ab110242         |
| CII-30 (SDHB)           | Abcam                                        | ab14714          |
| CIII-Core II (UQCRC2)   | Abcam                                        | ab14745          |
| CIV-I (MTCO1)           | Abcam                                        | ab14705          |
| CV-a (ATP5A)            | Abcam                                        | ab14748          |
| Dystrophin              | Sigma-Aldrich, Missouri, USA                 | D8168            |
| eIF2 $\alpha$           | Cell Signaling                               | 5324             |
| Hsp27                   | Santa Cruz Biotechnology                     | sc-13132         |
| MuRF-1                  | Abcam                                        | ab77577          |
| Myostatin               | Santa Cruz Biotechnology                     | sc-34781         |
| IRE1 $\alpha$           | Cell Signaling                               | 3294             |
| LAMP2A                  | Abcam                                        | ab18528          |
| LC3                     | Medical & Biological Laboratories Co., Japan | PD014            |
| Myf5                    | Abcam                                        | ab125078         |
| Myf6                    | Santa Cruz Biotechnology                     | sc-301m          |
| MyoD                    | Santa Cruz Biotechnology                     | sc-760           |
| p62                     | Abnova, Taipei, Taiwan                       | H00008878-M01    |
| Pax7                    | Abcam                                        | ab199010         |
| phospho-CaMKII          | Cell Signaling                               | 3361             |
| phospho-eIF2 $\alpha$   | Cell Signaling                               | 3398             |
| phospho-RYR1            | Abcam                                        | ab59225          |
| Puma                    | Cell Signaling                               | 4976             |
