# Supplementary material for: Cell interactome in sarcopenia during aging
Source: PubMed Central journal article supplement — J Cachexia Sarcopenia Muscle. 2022 Feb 17;13(2):919–31. doi: 10.1002/jcsm.12937 (PMC8977965; doi:10.1002/jcsm.12937), 2022-02-17
Supplement: JCSM-13-919-s002.pdf [file JCSM-13-919-s002.pdf]

## Supplemental References

- [S1] Hill BG, Shiva S, Ballinger S, Zhang J, Darley-Usmar VM. Bioenergetics and translational metabolism: implications for genetics, physiology and precision medicine. *Biol Chem.* 2019;401:3-29.
- [S2] Baierle M, Nascimento SN, Moro AM, Brucker N, Freitas F, Gauer B, Durgante J, Bordignon S, Zibetti M, Trentini CM, Duarte MM, Grune T, Breusing N, Garcia SC. Relationship between inflammation and oxidative stress and cognitive decline in the institutionalized elderly. *Oxid Med Cell Longev.* 2015;2015:804198.
- [S3] Keller K. Sarcopenia. *Wien Med Wochenschr.* 2019;169:157-172.
- [S4] Fortes MA, Marzuca-Nassr GN, Vitzel KF, da Justa Pinheiro CH, Newsholme P, Curi R. Housekeeping proteins: How useful are they in skeletal muscle diabetes studies and muscle hypertrophy models? *Anal Biochem.* 2016;504:38-40.
- [S5] Junjappa RP, Patil P, Bhattarai KR, Kim HR, Chae HJ. IRE1 $\alpha$  Implications in Endoplasmic Reticulum Stress-Mediated Development and Pathogenesis of Autoimmune Diseases. *Front Immunol.* 2018;9:1289.
- [S6] Gumucio JP, Mendias CL. Atrogin-1, MuRF-1, and sarcopenia. *Endocrine* 2013;43:12-21.
