# Supplementary material for: Cell interactome in sarcopenia during aging
Source: PubMed Central journal article supplement — J Cachexia Sarcopenia Muscle. 2022 Feb 17;13(2):919–31. doi: 10.1002/jcsm.12937 (PMC8977965; doi:10.1002/jcsm.12937), 2022-02-17
Supplement: JCSM-13-919-s003.pdf [file JCSM-13-919-s003.pdf]

**Table S3** Biochemical evaluation

|                                | <b>Functional independent</b> | <b>Functional dependent</b> | <b>P-value</b> | <b>Sig.</b> |
|--------------------------------|-------------------------------|-----------------------------|----------------|-------------|
| N                              | 15                            | 15                          | -              | -           |
| Albumin (g/dl)                 | 3.6 ± 0.09                    | 3.21 ± 0.11                 | 0.0097         | **          |
| Alkaline phosphatase (U/l)     | 69.82 ± 8.43                  | 80.55 ± 3.65                | 0.2564         | NS          |
| Alanine aminotransferase (U/l) | 30.25 ± 7.3                   | 21.5 ± 7.16                 | 0.4013         | NS          |
| Creatinine (mg/dl)             | 0.86 ± 0.02                   | 1.49 ± 0.3                  | 0.0484         | *           |
| Glucose (mg/dl)                | 106.8 ± 4.78                  | 93.62 ± 6.14                | 0.1019         | NS          |
| Potassium (meq/l)              | 4.21 ± 0.07                   | 4.52 ± 0.16                 | 0.0901         | NS          |
| Sodium (meq/l)                 | 141 ± 0.69                    | 138.8 ± 0.64                | 0.0253         | *           |
| Total proteins (g/dl)          | 6.12 ± 0.11                   | 5.69 ± 0.18                 | 0.0547         | NS          |
| Triglycerides (mg/dl)          | 130.2 ± 8.44                  | 107.2 ± 12.46               | 0.1482         | NS          |
| Urea (mg/dl)                   | 40.93 ± 4.5                   | 51.21 ± 7.56                | 0.2465         | NS          |
| Uric acid (mg/dl)              | 3.08 ± 0.31                   | 3.37 ± 0.37                 | 0.5536         | NS          |

Data are represented as the mean ± SEM. Sig., Significance; NS, not significant. \*  $P < 0.05$ ; \*\*  $P < 0.01$ .
