# Supplementary material for: Cell interactome in sarcopenia during aging
Source: PubMed Central journal article supplement — J Cachexia Sarcopenia Muscle. 2022 Feb 17;13(2):919–31. doi: 10.1002/jcsm.12937 (PMC8977965; doi:10.1002/jcsm.12937), 2022-02-17
Supplement: JCSM-13-919-s004.pdf [file JCSM-13-919-s004.pdf]

**Table S1** Participant characteristics

|                | <b>Functional independent</b> | <b>Functional dependent</b> | <b>P-value</b> | <b>Sig.</b> |
|----------------|-------------------------------|-----------------------------|----------------|-------------|
| N              | 15                            | 15                          | -              | -           |
| Age            | 84 ± 8                        | 87 ± 7                      | 0.084          | NS          |
| Sex (women)    | 12 (80%)                      | 11 (73%)                    | 0.679          | NS          |
| Barthel index  | 95 ± 2.03                     | 28.21 ± 3.26                | < 0.0001       | ***         |
| Charlson index | 0.85 ± 0.25                   | 1.5 ± 0.23                  | 0.068          | NS          |

Data are represented as the mean ± SEM. Sig., Significance; NS, not significant. \*\*\*  $P < 0.001$ .
